# Supplementary material
Source: PubMed Central journal article supplement (PMC8284815)

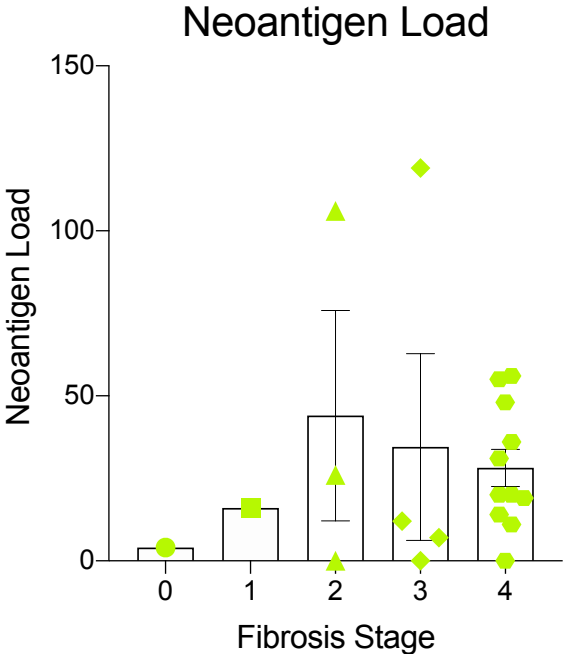

Supplement: NIHMS1621632-supplement-2.pdf [file NIHMS1621632-supplement-2.pdf]

Supplementary Figure S2

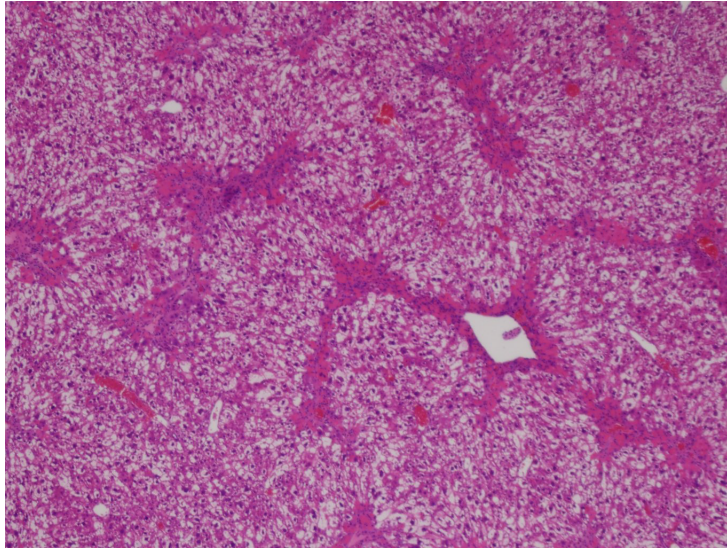

Supplement: NIHMS1621632-supplement-3.pdf [file NIHMS1621632-supplement-3.pdf]

Supplementary Figure S3

A

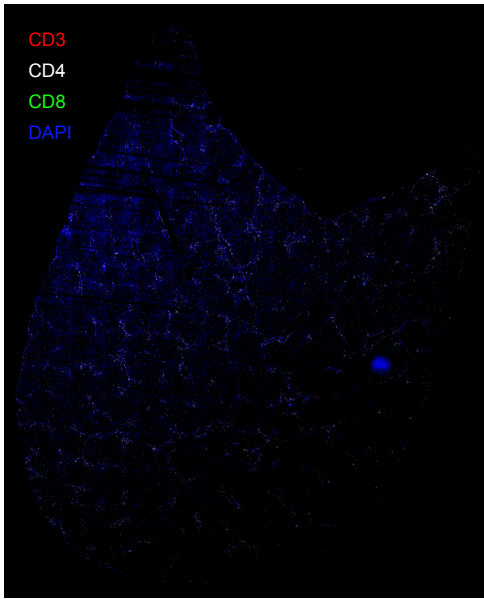

B

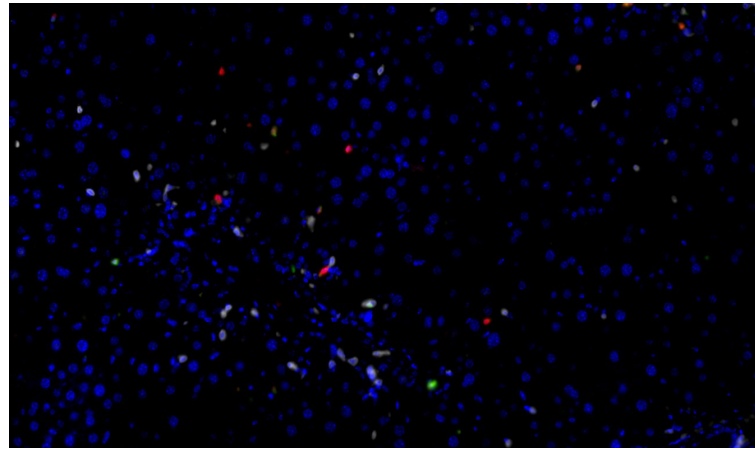

C

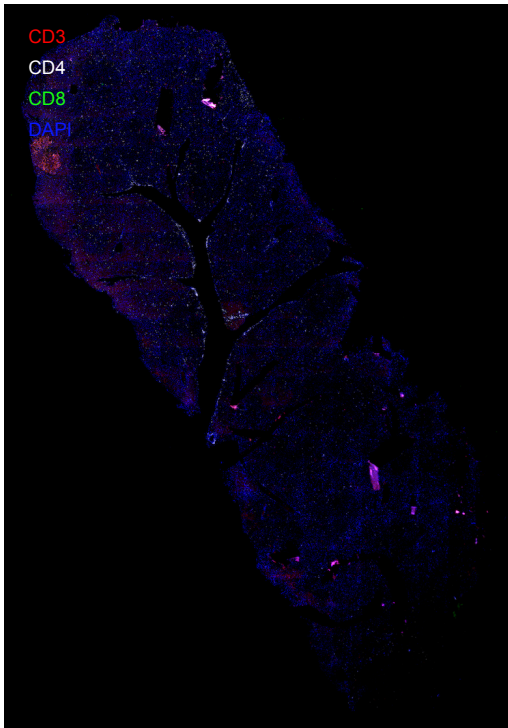

D

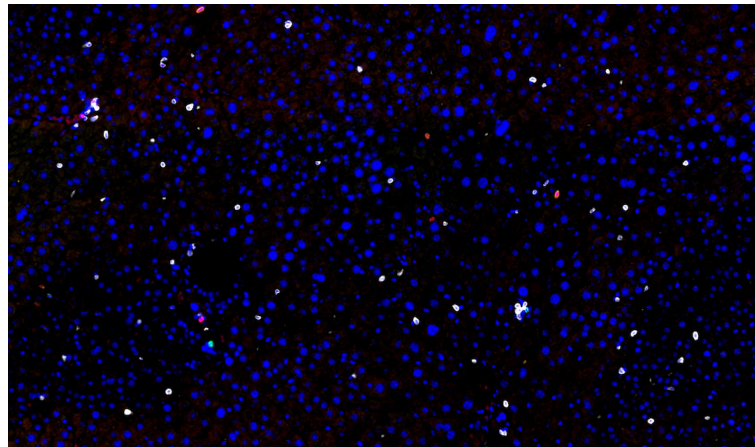

Supplement: NIHMS1621632-supplement-4.pdf [file NIHMS1621632-supplement-4.pdf]

## Supplementary Figure S4

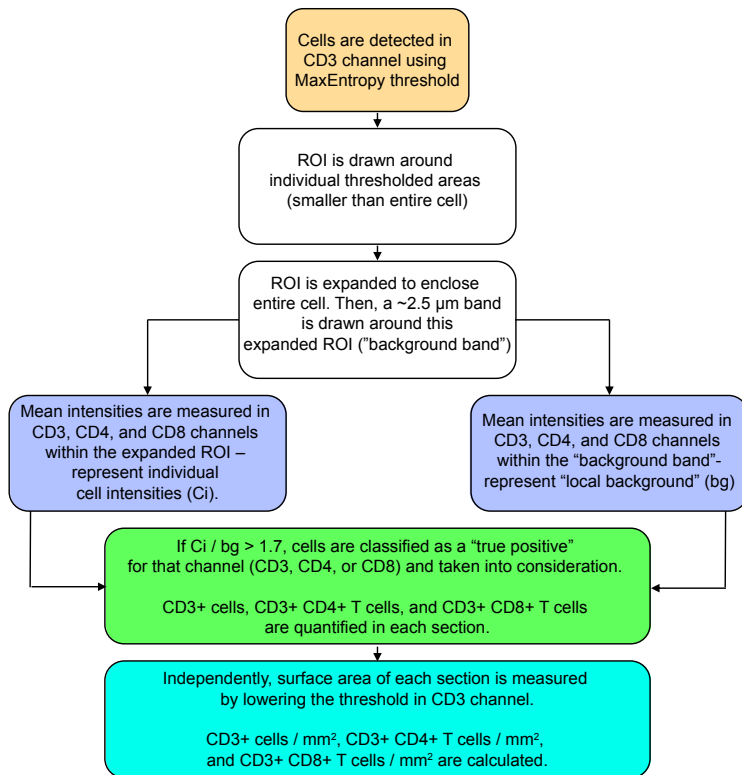

Supplement: NIHMS1621632-supplement-5.pdf [file NIHMS1621632-supplement-5.pdf]

Supplementary Figure S5

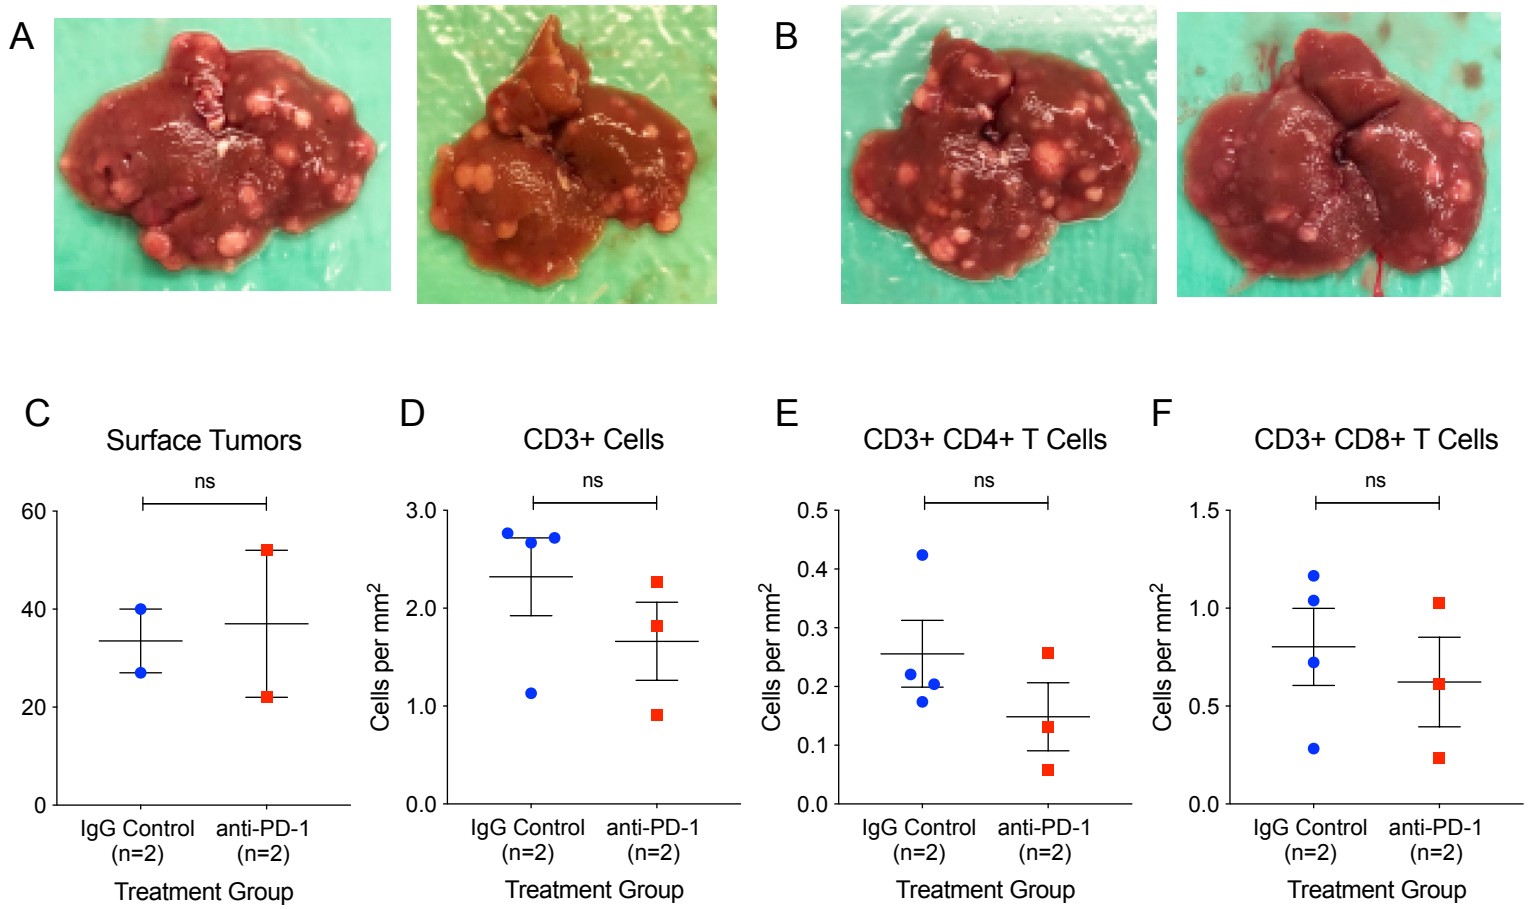

Supplement: NIHMS1621632-supplement-6.pdf [file NIHMS1621632-supplement-6.pdf]
